# **Evidence of extensive intraspecific noncoding reshuffling in a 169-kb mitochondrial genome of a basidiomycetous fungus**

Hsin-Han Lee<sup>1</sup>, Huei-Mien Ke<sup>1</sup>, Chan-Yi Ivy Lin<sup>1</sup>, Tracy J. Lee<sup>1</sup>, Chia-Lin Chung<sup>2</sup>, and Isheng J. Tsai<sup>1</sup>

<sup>1</sup>Biodiversity Research Center, Academia Sinica, Taipei City, Taiwan

<sup>2</sup>Department of Plant Pathology and Microbiology, National Taiwan University, Taipei City, Taiwan

Correspondence: Isheng Jason Tsai ([ijtsai@sinica.edu.tw](mailto:ijtsai@sinica.edu.tw))

## **Abstract**

Comparative genomics of fungal mitochondrial genomes (mitogenomes) have revealed a remarkable pattern of rearrangement between and within major phyla owing to horizontal gene transfer (HGT) and recombination. The role of recombination was exemplified at a finer evolutionary time scale in basidiomycetes group of fungi as they display a diversity of mitochondrial DNA (mtDNA) inheritance patterns. Here, we assembled mitogenomes of six species from the Hymenochaetales order of basidiomycetes and examined 59 mitogenomes from two genetic lineages of *Pyrrhoderma noxium*. Gene order is largely colinear while intergene regions are major determinants of mitogenome size variation. Substantial sequence divergence was found in shared introns consistent with high HGT frequency observed in yeasts, but we also identified a rare case where an intron was retained in five species since speciation. In contrast to the hyperdiversity observed in nuclear genomes of *P. noxium*, mitogenomes' intraspecific polymorphisms at protein coding sequences are extremely low. Phylogeny based on introns revealed turnover as well as exchange of introns between two lineages. Strikingly, some strains harbor a mosaic origin of introns from both lineages. Analysis of intergenic sequence indicated substantial differences between and within lineages, and an expansion may be ongoing as a result of exchange between distal intergenes. These findings suggest that the evolution in mtDNAs is usually lineage specific but chimeric mitotypes are frequently observed, thus capturing the possible evolutionary processes shaping mitogenomes in a basidiomycete. The large mitogenome sizes reported in various basidiomycetes appear to be a result of interspecific reshuffling of intergenes.

## Introduction

A typical fungal mitochondrial genome (mitogenome) consists of a circular DNA, which encodes 14 mitochondrial-exclusive protein-coding genes, ribosomal RNAs (rRNAs) and transfer RNAs usually in clusters (Férandon, et al. 2013; Aguilera, et al. 2014; Sandor, et al. 2018). Depending on groups, these elements are encoded either on the same strand in ascomycetous or on both in basidiomycetous mitogenomes (Aguilera, et al. 2014). These genomes are highly diversified in size ranging from 19,431 bp in *Schizosaccharomyces pombe* (Bullerwell, et al. 2003) to 235,849 bp in *Rhizoctonia solani* (Losada, et al. 2014). Variations in mitogenome size can be large among species within a genus (Bullerwell, et al. 2003) or among strains of the same species (Wolters, et al. 2015). Presence and expansion of introns in mitogenome protein encoding genes as well as sizable noncoding regions (NCRs) are major determinants of fungal mitogenome size variations (Xu and Wang 2015; Sandor, et al. 2018). Given that the highly variable nature of fungal mitogenome size, characterizing the dynamics of introns and determining the origin and function of these NCRs is critical for understanding the evolution of fungal mitogenome.

Inheritance of mitochondrial DNA (mtDNA) is predominantly maternal in sexual plants and animals (Xu and Wang 2015; Sandor, et al. 2018). In the Fungi kingdom, however, alternative modes of inheritance have been commonly reported during sexual reproduction (Berger and Yaffe 2000; Basse 2010; Wilson and Xu 2012; Xu and Wang 2015). For instance, the model ascomycete yeasts, *Saccharomyces cerevisiae* and *Schizosaccharomyces pombe*, are known to inherit mitochondria biparentally (Wolf, et al. 1976; Basse 2010; Xu and Wang 2015). The zygote contains mtDNA from both parents and subsequently segregated into homoplasmic progenies through the process of syngamy. Like animals and plants, the mating process in filamentous ascomycetes usually initiated with the fusion of two morphologically different gametes, and the mitochondria are typically inherited from the larger gamete (Sandor, et al. 2018). For basidiomycetes, various modes of mitochondrial inheritance may have been involved in generating recombinant mitochondrial genotypes (Xu and He 2015; Xu and Wang 2015; Sandor, et al. 2018).

In fungi, tight regulation of mtDNA transmission is part of molecular mechanisms responsible for sex determination (mating). For model basidiomycetes yeast *Cryptococcus neoformans*, mtDNA is inherited uniparentally from *MATa* parent but becomes biparental if the sex-specific homeodomain transcription factor *sxi1a* and *sxi2a* are disrupted (Xu, et al. 2000; Yan and Xu 2003). A closely related species of *C. neoformans*, *C. gattii* exhibited different inheritance patterns depending on strain combinations and environmental factors such as temperature (Voelz, et al. 2013; Zhu, et al. 2013; Wang, et al. 2015). For *U. maydis*, which has a tetrapolar mating system similar to the model mushroom *Coprinopsis cinerea*, the mtDNA inheritance is controlled by *lga2* and *rga2* of uncertain function encoded by *a2* locus (homologous to *C. cinerea matB* locus) (Fedler, et al. 2009).

Strictly selecting mtDNA from only one parent during mating ensures uniparental inheritance. This is the case for model filamentous basidiomycetes such as *C. cinerea* and *Schizophyllum commune*, where the formation of diploid involves nuclear but not mitochondrial migration, resulting in genetically identical dikaryons with different mitochondria from either parent (Sandor, et al. 2018). Nuclear migration is controlled by *matB* locus encoding peptide pheromones and pheromone receptors (Casselton and Kües 2007), again indicating a strong correlation between mating locus and mitochondria inheritance. Alternatively, the button mushroom *Agaricus bisporus* as well as many basidiomycetes do not undergo nuclear migration and clamp formation; instead, they undergo direct hyphal fusion during mating process. This means different mitochondrial genotypes can be present within hyphal cells, suggesting the opportunity to exchange DNA via mitochondrial recombination. Indeed, *A. bisporus* is known to have uniparental and non-parental mitochondrial inheritance patterns (Hintz, et al. 1988; Jin and Horgen 1993, 1994; de la Bastide and Horgen 2003). Hence, the ephemeral diploid phase may be particularly important in mitochondrial inheritance and diversity (de la Bastide and Horgen 2003; Xu and Wang 2015).

Among the estimated 2.2–3.8 million fungal species (Hawksworth and Lücking 2017), many lineages still lack a formal description or analysis of mitogenomes. One interesting case is the order Hymenochaetales (Agaricomycetes, Basidiomycota), which is dominated by wood decay fungi. Most species in this order are saprotrophic, but some are pathogens involved in major forest incidents since 1971 in different parts

of the world (Hepting 1971; Sahashi, et al. 2012). In particular, *Pyrrhoderma noxium* (syn. *Phellinus noxius*) (Zhou, et al. 2018) has a very wide host range, spanning more than 200 broadleaved and coniferous tree species (at least 59 families), and are the causative agents responsible for brown root rot disease in parts of Asia (Akiba, et al. 2015; Chung, et al. 2015). A recent comparative and population genomics study of six genomes from this order and 60 *P. noxium* strains from Taiwan and Japan revealed that *P. noxium* possesses extraordinarily high diversity in its nuclear genomes (Chung, et al. 2017).

*P. noxium* lacks clamp connections (Ann, et al. 2002) and displays a bipolar heterothallic mating system (Chung, et al. 2017) with a highly expanded A locus spanning a ~60-kb region. The availability of whole genome sequences of *P. noxium* populations prompted us to further understand the evolution of mitogenomes in this hypervariable species. In this study, we first assembled and compared the mitogenomes of *P. noxium* and five Hymenochaetales species. We demonstrated that core genes are largely in syntenic across these species while both introns and NCRs constitute the majority of *P. noxium* mtDNA. We then examined mitogenome evolution from two genetically independent lineages of *P. noxium* and discovered frequent rearrangement in NCRs. The main purpose of this study was to elucidate possible mechanisms driving mitogenome enlargement in *P. noxium* at a population level. We provided evidences of frequent mitochondrial exchange possibly in heteroplasmy stage during hyphal fusion and mating resulting in recombinant mitotype and expanding mitogenome.

## Materials and Methods

### ***De novo* assembly or reconstruction of four Hymenochaetales mitochondrial genomes**

Sequencing data of *Pyrrhoderma noxium*, *Pyrrhoderma lamaense* (syn. *Phellinus lamaensis*), *Porodaedalea pini* and *Coniferiporia sulphurascens* (syn. *Phellinus sulphurascens*) were described in Chung, et al. (2017). Mitochondrial genomes (mitogenomes) were assembled in 1-6 iterations using Organelle\_PBA (v1.0.7; Soorni, et al. 2017) with PacBio reads until sequence circularity was detected. Partial mitochondrial DNA (mtDNA) sequence in the published assembly of each species or

conserved protein-coding gene was used as initial reference for the first run. Illumina sequencing data of *Fomitiporia mediterranea* (Floudas, et al. 2012) were obtained from Joint Genome Institute (JGI) database (<https://genome.jgi.doe.gov/Fomme1/Fomme1.home.html>). The *F. mediterranea* mitogenome was assembled using NOVOplasty (v2.6.7; Dierckxsens, et al. 2017) with *P. pini*'s mitogenome as the seed sequence. Circularity was assessed either by in-built function in the assemblers or subsequently by “check\_circularity.pl” script distributed with sprai *de novo* assembly tool (v0.9.9.23; <http://zombie.cb.k.u-tokyo.ac.jp/sprai>). The consensus of assemblies were improved using pilon (v1.22; Walker, et al. 2014). The complete mitogenome of *Schizopora paradoxa* (Min, et al. 2015) is available in JGI database (<https://genome.jgi.doe.gov/Schpa1/Schpa1.home.html>) and was retrieved for further annotation and analysis.

# **Annotation of mitogenomes**

Core genes in mitogenomes were annotated using MFannot web service (<http://megasun.bch.umontreal.ca/cgi-bin/mfannot/mfannotInterface.pl>) with genetic code table 4. Exon boundaries were further manually curated based on multiple sequence alignment of homologues from closely related species using muscle (v3.8.31; Edgar 2004) and RNA-seq alignments where available. tRNA genes were predicted by MFannot, tRNAscan-SE (v2.0; Lowe and Chan 2016) and aragorn (v1.2.38; Laslett and Canbäck 2004). Only tRNA positions supported by at least two programs were retained for further analysis. Putative open reading frames (ORFs) were predicted by NCBI ORFfinder (v0.4.3; Wheeler, et al. 2003) against exon-masked mitogenomes, and hypothetical proteins were searched against Pfam (Finn, et al. 2016) and NCBI protein nr database (<https://www.ncbi.nlm.nih.gov/protein>) for evidence of homing endonuclease (HE) and DNA/RNA polymerase (dpo/rpo) genes. Introns were assigned into subgroups using RNAfinder (v1.40; <https://github.com/BFL-lab/RNAfinder>). Putative homing endonuclease domains in introns were searched by PfamScan (v31; Finn, et al. 2016). Direct and palindromic repeats were searched using Vmatch (v2.3.0; <http://www.vmatch.de>) with parameters of “-seedlength 30 -l 30 -exdrop 3 -identity 80”. Tandem repeats were identified using Tandem Repeat Finder (v4.09; Benson 1999) with default parameters. Analysis of simple sequence repeats (SSRs) were performed by MISA (v2.0; Thiel, et al. 2003) with default parameters.

## RNA sequencing

The mycelia of *P. noxium* KPN91 were cultured on the PDA agar plates at 25 °C for about 3–5 days. Total RNA was extracted from mycelia homogenized in liquid nitrogen, following with TRIzol™ Reagent (catalog no. 15596018, Thermo Fisher Scientific, Inc.). 200 ng poly-A enriched RNA was purified from total RNA by using Dynabeads mRNA purification kit (catalog no. 61006, Thermo Fisher Scientific, Inc.), and was used to conduct cDNA library preparation with Direct cDNA Sequencing kit (SQK-DCS108; Oxford Nanopore Technologies). The reads were sequenced with FLO-MIN106 flow cell on a GridION, Oxford Nanopore and then basecalled by dogfish v0.9.3. Illumina RNA-seq reads of four species in this study (*P. noxium*, *P. lamaoense*, *P. pini* and *C. sulphurascens*) were downloaded and aligned to corresponding assemblies using STAR (v2.6.0a; Dobin, et al. 2013). Nanopore cDNA reads (*P. noxium*) were aligned using minimap2 (v2.6; Li 2018). Only reads aligned to mitogenome were retained for further analysis.

## Assembly and annotation of *P. noxium* isolates

The sequencing data of a total of 59 *P. noxium* isolates were described in a previous study (Chung, et al. 2017). All of the mitogenomes were assembled using the same pipeline with *F. mediterranea* as described above except that the seed sequence was *P. noxium* KPN91 mitogenome. Annotation of core genes was searched with query of curated genes of KPN91 using GMAP (v2017-11-15; Wu and Watanabe 2005), followed by multiple sequence alignment using muscle (v3.8.31; Edgar 2004) to identify precise exon-intron boundaries. tRNA annotation was processed as described above. The four (three ‘large’ ranging 6.3–35.4 kb and a small 4.6–8.9 kb) regions were defined and characterised by their frequently rearrangements when compared to KPN91 mtDNA reference (region 1: *nad4-rnl*, region 2: *atp8-cox1*, region 3: *nad5-rns* and region 4s: *cox2-cob*).

## Phylogenetic analysis

The core genes phylogeny of six Hymenochatales species was carried out using concatenated amino acid alignments of 15 mitochondrial core genes by muscle (v3.8.31; Edgar 2004), and pruned by trimal strict plus mode (v1.4; Capella-Gutierrez, et al. 2009). A maximum-likelihood phylogeny was computed using iqtree (v1.6.6; Nguyen, et al. 2015) with LG+F+I+G4 model and 100 bootstrap replicates. The same approach



was used to produce the intron phylogeny for *P. noxium* isolates, except that ModelFinder (Kalyaanamoorthy, et al. 2017) in iqtree was used to automatically determine the best-fit model. To validate the robustness of mitochondrial core genes phylogeny, four unpublished Hymenochaetales species available on JGI database (*Onnia scaura*, *Phellinus ferrugineofuscus*, *Porodaedalea chrysoloma* and *Porodaedalea niemelaei*) were used to replot the phylogeny.

## Results

### Assembly and annotation of six Hymenochaetales mitochondrial genomes

There are two published mitogenomes in Hymenochaetales species, with genome size ranging from 57.5 kb in *Schizopora paradoxa* (Min, et al. 2015) to 163.4 kb in *Pyrrhoderma noxium* (Chung, et al. 2017). Such large differences in mitogenome sizes prompted us to assemble four more Hymenochaetales species using available Illumina or Pacbio long sequences: *P. lamaoense*, *P. pini*, *C. sulphurascens* and *F. mediterranea*. The four Hymenochaetales mitogenomes now range from 45.6 kb to 145.0 kb (table 1), again showing high variations. GC content are low (23.4–34.6%), consistent with the AT rich nature of fungal mitogenomes (Hausner 2003). Remapping of Illumina reads against the mitogenomes showed no heterozygosity, suggesting that mitogenomes are homozygous in these species with no evidence of heteroplasmy. All six species were predicted to contain 14 fungal core protein-coding genes, two ribosomal RNA genes and one ribosomal protein S3 gene (fig. 1, S1 and S2A). 25 tRNAs encoding 20 standard amino acids were shared across 6 species and positioned into 3–5 clusters, with the presence of 1–2 species-specific tRNA. All 17 core genes and tRNA clusters of six species are encoded on the same strand with an exception of a histidine tRNA in *S. paradoxa* (fig. S1E). Interestingly, in four Hymenochaetales species, *nad5* starts (ATG) immediately from the last base of adjacent *nad4L* stop codon (TAA), which has been observed in various fungal mitochondria (Férandon, et al. 2013; Wang, Zhang, et al. 2018).

Coding contents are relatively conserved across the six Hymenochaetales species (average 22.5 kb), however, huge variations were observed in their intronic and

intergenic sequences. Prediction of open reading frames (ORFs) in intronic and intergenic regions resulted in 18–100 putative protein-coding sequences (table 1 and table S1). Majority of the ORFs did not show homology across various databases. The ORFs with confident protein domain profiles assigned were mostly homing endonuclease (HE, containing LAGLIDADG or GIY-YIG domain) and family B DNA polymerase (*dpoB*). *P. noxium* has the largest mitogenome among the six Hymenochaetales species, with 38.2% introns and 48.4% intergene sequences. The mitogenome of *P. pini* has an intron content of 17.5% and 65.7% intergene region. In contrast, *P. lamaoense* has the most reduced mitogenome with highest percentage of coding content (46.8%). We further investigated whether repetitive sequences contributed to the noncoding content of these mitogenomes. The total repeat content accounted for 2.9%–8.5% of mitogenomes, with only two large palindromic repeats (> 500 bp) observed in *P. pini*. These repeats did not contribute to the majority of noncoding content as only 4.7%–12.2% of intergenic sequences were classified as repetitive. The invertron-like sequences are plasmids integrated into fungal or plant mtDNA, usually consisting of *dpoB* and DNA-dependent RNA polymerase between inverted repeats (Hausner 2012; Mardanov, et al. 2014). Although intact invertron-like sequences were not observed, we found at least one *dpoB* gene in each mitogenome suggesting possible ancient integration events.

## Gene synteny

Species phylogeny inferred from 1,127 orthologous single copy genes placed species of similar genome sizes and primary habits together with *S. paradoxa* being the most diverged clade (Chung, et al. 2017). The mitochondrial phylogeny of six Hymenochaetales was inferred from concatenation of 15 core protein-coding genes (fig. 2). Different from the nuclear phylogeny, *C. sulphurascens* was in the same clade with *P. pini* and *F. mediterranea*. The gene order of 17 core protein, noncoding genes and tRNA clusters were considerably conserved across five of the six Hymenochaetales species. For example, the largest synteny block started from *cox1* and extended to 22 genes (blue box). Greatest difference was found in *S. paradoxa*, which agrees with the nuclear phylogeny (Chung, et al. 2017). In the clade of *P. noxium* and *P. lamaoense*, *nad4* and *rnl* gene were both relocated to downstream of t1 tRNA cluster. Furthermore, the location of t2 tRNA cluster and *rps3-atp8* block were swapped in *P. lamaoense*. *P. noxium* and *P. lamaoense* both harboured a tRNA between *nad4* and *rnl*. The two



tRNAs shared 88.9% identity in the 72-bp gene region, suggesting accumulation of mutations in a recently gained gene. Boundaries of intergenic spacers were similar between *P. noxium* and *P. lamaoense* but not across other species. Gene duplication events were only observed in t2 in *P. pini* and t5 tRNA clusters in *F. mediterranea*.

### **Mitochondrial intron dynamics**

*P. noxium* mitogenome contains most introns in six species, with 61 introns spreading in 9 genes. In contrast, *C. sulphurascens* mitogenome contains only one intron in *cob* gene. The largest reservoir of introns is *P. noxium cox1* gene, which retains 23 group I introns and a group II intron (17<sup>th</sup> intron), accounting for 93.5 % of this gene. A total of 122 introns locating in 65 genetic sites were identified in six Hymenochaetales mitogenomes, with 39 sites were shared among species (fig. 3 and table S2). No introns were found in eight genes (*atp6*, *atp8*, *atp9*, *nad3*, *nad4L*, *nad6*, *rns* and *rps3*) whereas the *cob* gene contained at least one intron in every species. The majority of introns were of group I (114/122) and were classified into six subgroups (IA, IA3, IB, IC2, ID and I-derived). Of these, group IB introns accounted for 57.4% of total introns (70/122). Interestingly, the 13<sup>th</sup> intron of *P. noxium cox1* gene (*cox1\_intron13*) was predicted to have two separated complete intron cores (IB and ID) suggesting a twintron: an intron inserted by another intron (Deng, et al. 2018).

One possible explanation for the prevalence of introns in these species is the presence of homing endonucleases (HEs), which are highly specific endonucleases playing an important role in intron homing and precise splicing in group I introns (Haugen, et al. 2005; Lang, et al. 2007). We searched for protein domains and ORFs, revealing that 65 introns each containing at least one LAGLIDADG or GIY-YIG domain. Nine of these introns did not have any predicted ORF suggesting loss of HE activity. Conversely, 12 intronic ORFs showed no evidence of HE domain. In addition to group I introns, we found 3 out of 5 group II introns comprising a putative LAGLIDADG domain, which has been reported in several filamentous fungi but showed no activity in enhancing splicing itself. LAGLIDADG domain might be an invaded group I HEG in a group II intron (Toor and Zimmerly 2002; Mullineux, et al. 2010). Only a group II intron (*PNOK\_rnl\_intron01*) comprised an intact ORF with complete reverse transcriptase (RT) domain.

Out of 39 intron sites present in multiple species, 34 comprised introns belonging to the same subgroup suggest a preference of insertion (Swithers, et al. 2009). Alternatively, these introns may have already been inserted since their common ancestor; however, this may be less likely as the shared introns showed as low as 74.3% nucleotide identity. This scenario may be more likely in sites where introns are still found in more than three species. There are three such intron sites (cob\_site5, cox1\_site10 and cox1\_site13) and phylogeny indicated two sites (cox1\_site10 and cox1\_site13) were concordant with the mitochondrial phylogeny, suggesting the intron was present since these species' common ancestor (fig. S3).

### **Population mitogenomics of *P. noxium* – general characteristics**

The mitogenomes of additional 58 *P. noxium* isolates from Japan and Taiwan region were assembled into single circular sequences using NOVOPlasty (table S3). The mitogenome size can differ by 22 kb ranging from 146,191 bp of Pn102 to 168,365 bp of Pn120. A strong correlation was observed in intergenic region and mitogenome size ( $R^2 = 0.987$ ,  $P < 0.001$ ; fig. 4) but not exonic and intronic sequences ( $R^2 = 0.0213$  and  $R^2 = 0.0203$ , respectively; fig. 4), suggesting that the expansion of mitochondria was mainly contributed by intergenic regions in *P. noxium*.

### **Low intraspecific polymorphism in coding regions**

All 17 core genes were present in all isolates. Gene structures were highly conserved except for two protein-coding genes. Stop codon in the majority of isolates in the *cox2* gene was lost in 3 isolates with two possible changes (minor allele 1: KPN57 and Pn315, minor allele 2: Pn040). The prevalent allele encoded for a 765 bp *cox2* gene with 5 exons, and two minor alleles extended 972 bp and 1,008 bp in the last exon, respectively. In *nad2* gene, a tandem repeat [(AGAACTAA)<sub>3.8–7.8</sub>] located in the second exon varied the length of coding regions from 1,695 bp to 1,731 bp without interrupting the reading frame. Across 4,603 amino acid sites, only 13 and seven were parsimony-informative and singletons, respectively (fig. S4). Number of tRNA ranged from 26–27. A free-standing tRNA between *nad4* and *rnl* was found to alternatively code for lysine and arginine in these species. Two SNPs were observed in the 72-bp exon region resulting in two different alleles. In 5 isolates (Pn081, Pn102, Pn329, KPN141 and KPN163), a point mutation in the anticodon period turns the lysine tRNA (anticodon: ctt) into an arginine tRNA (anticodon: cct), accompanying the translocation of

surrounding sequences (Fig. S7C). The lysine tRNA was lost in 4 isolates (Pn015, Pn035, Pn086 and Pn127) due to large fragment deletion (Fig. S7D), suggesting that it might not be an essential tRNA.

### **Frequent gain and loss of introns**

Introns range from 57 to 61 in nine intron-containing genes in 59 *P. noxium* isolates (fig. S5). *P. noxium* KPN91, which harboured most introns, had an exclusive group II intron of rnl\_intron01 with an intact RT domain, suggesting the intron was recently acquired. Completely loss of introns in some isolates were observed in five intron positions (cox1\_intron04, cox1\_intron06, cox1\_intron07, rnl\_intron02 and rnl\_intron11). In contrast to the nuclear genome phylogeny, we constructed a phylogeny using the concatenated intronic sequences and revealed three lineages (fig. S6). The majority of Taiwanese and Ryukyu isolates were clustered together, while all eight isolates from Ogasawara island were part of the final group. The result was consistent with the inferences based on nuclear genomes (Chung, et al. 2017). Two Taiwanese isolates were clustered together with the Ogasawara isolates in the intron phylogeny with 100 bootstrap support (fig. S6). We identified three Taiwanese isolates (Pn050, Pn120 and Pn315) as a third lineage, showing a distinct pattern in *cox1* intron 4 to 8 with two introns possessing low identity to other strains and absence of intronic sequences in three sites (fig. 5 and S5).

To analyse the intron dynamics in these three lineages, we first chose one species from Taiwan/Ryukyu (KPN91) and Ogasawara (KPN232) lineage as a reference and calculated nucleotide identity of all introns against these references. Intron identity of pairwise comparisons between two references are on average 97.1%, with 11 introns identical to each other. The intron with the lowest pairwise identity was rnl\_intron12 with 41.8%, and a closer inspection revealed a unique double sized rnl\_intron12. We plotted a heatmap of intron identity according to both references and revealed a mosaic pattern of intron distributions. With the double sized rnl\_intron12, the introns of the two Taiwanese isolates that were clustered together to the Ogasawara lineage in the intron phylogeny resemble the introns of KPN323 more than that of KPN91 (Fig. 5). In contrast, strains belonging to the Taiwan/Ryukyu lineage have revealed striking differences amongst strains (fig. 5). Three modes were found: i) strains with introns that completely resemble the Taiwanese/Ryukyu reference, ii) strains with mosaic

intron patterns that resemble either Taiwan/Ryukyu or Ogasawara references, iii) strains with introns that were equally dissimilar to both references. These observations suggest that extensive rearrangement of introns have occurred in the Taiwan/Ryukyu lineage but less so in the Ogasawara lineage.

### **Evidence of extensive shuffling between large intergene regions separated by gene clusters**

To understand the causes of large intergene that are present in *P. noxium*, we first defined three large (region 1: *nad4-rnl* 11.3–25.9 kb, region 2: *atp8-cox1* 15.3–35.4 kb and region 3: *nad3-rns* 6.3–24.9 kb) and a small (region 4s: *cox2-cob* 4.6– 8.9 kb) intergenic regions. A close species *P. lamaoense* had only 11.3 kb in the regions we defined, comparing to an average of 66.2 kb in *P. noxium*. MtDNA alignment also showed no similarity with other species in this study, suggesting that these intergenic regions are *P. noxium*-specific (fig. S2B).

Frequent intra- and inter-rearrangements between four regions were observed. We first sought if a correlation exists between the intron phylogeny and intergene. However, in the two distinct clades defined by the intron phylogeny, similar synteny was observed in isolates belonging to different clades (fig. S7A, B). To investigate the effect of rearrangement in mitogenome evolution, we took KPN91 as a reference and sought if any rearrangement event occurred in the four defined intergenic regions (fig. S8). The 10 isolates in Ogasawara lineage had similar rearrangement pattern, and the intergene sizes were significantly shorter than that of Taiwan/Ryukyu lineage isolates ( $P < 0.01$ ; fig. 6). Isolates from the Taiwan/Ryukyu were subsequently classified into two groups based on intergene rearrangement pattern against KPN91 (fig. S8). They were also significantly different in length ( $P < 0.001$ ; fig. 6). The length of intergenic spacers in the isolates with rearrangement tended to be smaller than that of the isolates without rearrangement, resulting in a median difference of ~9.7 kb. Additionally, 5 isolates with intra-rearrangement in region 1 were accompanied with the translocation of a free-standing tRNA between *nad4* and *rnl*, suggesting that it was potentially a foreign gene (fig. S7C and D).

## Discussion

In our previous study, we reported four Hymenochaetales genomes and revealed the nature of hyperdiversity of nuclear genomes in two lineages of *P. noxium* in Taiwan and Japan areas (Chung, et al. 2015; Chung, et al. 2017). To understand the mitochondrial genomics in Hymenochaetales, we analysed six mitogenomes in this order. All mitogenomes can be circularized, indicating the high quality of these assemblies. All fungal mitochondrial core genes are present in these species, and the synteny are largely conserved according to their phylogenetic relationships. The overlapping start and stop codons of *nad* genes have been observed in not only fungi but also animals (Franco, et al. 2017; Wang, Shi, et al. 2018), presumably because of the mRNA transcription of these genes have remained coupled across independent lineages. Only tRNAs were found duplicated and lost, presumably due to the preference of mitochondrial recombination in these regions (Fritsch, et al. 2014).

The six mitogenomes varied by at most 3.6-fold in length, from 45.6 kb in *P. lamaoense* to 163.4 kb in *P. noxium*. In Organelle Genome Resources NCBI, only six species are larger than *P. noxium* (Losada, et al. 2014; Mardanov, et al. 2014; Kanzi, et al. 2016; Nowrousian 2016). Gain of introns have been depicted as the main constituents of the enlargement of fungal mitogenomes (Losada, et al. 2014; Mardanov, et al. 2014; Salavirta, et al. 2014; Kanzi, et al. 2016). In the case of Hymenochaetales, three out of the six species hold an impressively high number of introns (table 1). In particular, *coxI* harbours up to 23 introns in these species which is consistent to previous surveys in fungal mitogenomes as the most intron-containing gene.

Horizontal gene transfer (HGT) event have been implicated as the main causes and origins of intron gains in fungi (Hausner 2012; Wu, et al. 2015). We determined 39 out of 65 shared intron positions, however, only 14 and three intron sites were shared in more than two or three species, respectively. From these sites, we found only two examples of shared intron exhibiting same phylogenetic relationship as the species tree, implying an ancient transposition event. Additional evidence from comparative analysis of multiple species within an order will help reveal whether the retention of such introns has any selective advantage.

439

440 Intergenic regions constitute the majority of mitogenomes in all species in this study,  
 441 consistent with previous findings in yeast mitogenomes where intergenic sequences  
 442 played a role in genome expansion (Xiao, et al. 2017). The initial expansion of  
 443 intergenic regions may be contributed by the integration of plasmid-like sequences  
 444 since the few numbers of repetitive elements (Hausner 2003; Férandon, et al. 2013).  
 445 Unlike the introns which need to be spliced precisely for mature mRNA, the integrated  
 446 plasmid sequences are easily degenerated overtime due to the absence of selection  
 447 pressure (Hausner 2003; Swithers, et al. 2009). Integration of invertron plasmid in  
 448 mtDNA has been reported in many fungi species including *Moniliophthora perniciosa*,  
 449 *Agaricus bisporus*, and *Sclerotinia borealis* (Formighieri, et al. 2008; Férandon, et al.  
 450 2013; Mardanov, et al. 2014). We found at least one family B DNA polymerase located  
 451 in intergenic regions in all six species (table 1), but no putative RNA polymerase or  
 452 invertron-like repetitive elements, suggesting degenerated integrated-plasmid.

453

454 Our previous investigation on population-scale sequencing of *P. noxium* nuclear  
 455 genomes suggests that it is a hypervariable species. Hence, one of the aims of this study  
 456 was to investigate the evolution history of *P. noxium* from the mitochondrial  
 457 perspective. Surprisingly, the analysis of 59 isolates revealed different pace of evolution  
 458 across coding, introns and intergenic regions. The coding regions unusually harbor low  
 459 variation across the two lineages, suggesting strong purifying selection, i.e., arising  
 460 substitutions were quickly purged from the population. Considering the much higher  
 461 mutation rate in mitogenome than the nuclear genome (Jung, et al. 2012), additional  
 462 regulatory mechanisms may exist in hypervariable species to reduce potential  
 463 detrimental effects from the replication of mitogenome.

464

465 A previous investigation of intraspecific variations on three species of yeast determined  
 466 introns contributed the highest variance in genome size (Xiao, et al. 2017). Our intron  
 467 analyses of two lineages of *P. noxium* revealed high similarity but extensive  
 468 rearrangements of introns among strains of different clades. Based on current  
 469 knowledge in ascomycetes, there are two possible scenarios that can account for such  
 470 observations in a basidiomycete during hyphal fusion between strains of two mitotypes:  
 471 intron homing or homologous recombination (Haugen, et al. 2005; Wu, et al. 2015;  
 472 Leducq, et al. 2017). We observed few gain and loss of introns at population level so



recombination may be a more predominant process, which has been documented in various fungal species (Leducq, et al. 2017). Unfortunately, high similarity of intron sequences impedes further recombination-detection based analyses. Future investigations should focus on determination of mitochondrial inheritance mode and the frequency and mechanisms involved in intron rearrangements using artificial hybrids.

For the first time in our investigation, large variations at intergenic regions are documented at an intraspecies level, even though it has been commonly observed between closely related fungal species (Burger, et al. 2003; Aguilera, et al. 2014; Himmelstrand, et al. 2014). We have observed contrasting differences in intergene length between strains of different lineages as well as within a lineage. These findings suggest that, when compared to closely related species, intergene variations are currently driving intraspecific mitogenomic variation in *P. noxium* and may eventually lead to larger intergene variations. Intriguingly, repeats do not seem to play a major role in shaping such variations and it remains to be determined whether homologous recombination will lead to extension of intergenic sequences.

In conclusion, we have revealed for the first time that intergenic regions play a major role in shaping and extending the mtDNA in Basidiomycetes at inter- and intraspecies level. The extreme contrast between nuclear genome and coding region of mitogenome suggests strong purifying selection acting on these genes. Basidiomycetes can be excellent models in understanding mtDNA inheritance. A comprehensive sampling and detailed comparison across mitogenome will help delineate the relationship between mating and mitochondrial diversity.

## Authors contribution

I.J.T conceived the study. H.M.K, C.Y.I.L, T.J.L and C.L.C. established the strains collection, carried out experiments and sequencing. H.H.L carried out comparative analysis. I.J.T. and H.H.L wrote the manuscript.

## Competing interests

The authors declare no competing interests.

## Data availability

The complete mitochondrial genomes generated in this study have been deposited in NCBI and will be publicized under accession MK623257- MK623261 once internal processing are completed.

## Figure and table legends

### Figure 1: Genetic map of *Pyrrhoderma noxium* KPN91 mitogenome.

The first base is defined as the start of *rns* gene. The ticks on the circle are separated by 1 kb. The boxes adhered to the circle are genes and the half-sized boxes are predicted ORFs. The boxes at outside and inside of the circle indicates the genes encoding on positive and negative strand, respectively. Coloured regions are exons. In the inner circle, green tiles represent the tandem repeats and the black and red links represents the direct and palindromic repeats, respectively. The bold numbers indicated the four defined intergeneic regions (1, 2, 3 and 4s). The plot was generated using Circos software (Krzywinski, et al. 2009).

### Figure 2: Phylogenetic tree of mitochondrial protein-coding genes and gene synteny in six mitogenomes.

The colored boxes represent different conserved gene blocks. The intergene length larger than 1 kb are labeled above the gene wedges. The arrows below the gene wedges indicate gene duplication. The bootstrap values were inferred with 100 replicates.

**Figure 3: Shared intron positions and intron subgroups in six Hymenochaetales species.**

Details of intron properties refer to table S2. NA: not assigned to any subgroup.

**Figure 4: Correlation between mitogenome size and genome properties across 59 *Pyrrhoderma noxium* isolates.**

Each dot represents an isolate. Details refer to table S3.

**Figure 5: Heatmap of intron identity against KPN91 and KPN323.**

The intron positions with all identity scores > 99 % against KPN91 are removed. The numbers above the chart indicate the intron identity between KPN91 and KPN323. The tiles on the right of the chart are the lineages defined by intron pattern and intronic phylogeny. The y axis is the order of intronic phylogeny (fig. S6).

**Figure 6: Intergene length distribution and rearrangement events between Ogasawara and Taiwan/Ryukyu lineages.**

(A) The intergene length between lineages and rearranged or non-rearranged intergene against KPN91 (fig. S8) are significantly different (\*\*:  $P < 0.01$ , \*\*\*:  $P < 0.001$ ). The dotted line represents KPN91 intergene length. (B) Rearrangement events in four defined regions between lineages in (A). Red arrows are mitochondrial core genes and green tiles are tRNA genes. Red links between mitogenomes are aligned regions with identity > 80%. The intergene boundaries are labelled under Pn113. The plot was generated with genoplots package in R.

**Table 1: General statistics of six mitogenomes.**

| Species               | <i>P. noxium</i> | <i>P. lamaoense</i> | <i>P. pini</i>  | <i>F. mediterranea</i> | <i>C. sulphurascens</i> | <i>S. paradoxa</i> |
|-----------------------|------------------|---------------------|-----------------|------------------------|-------------------------|--------------------|
| Coverage (Pacbio)     | 2,860            | 6,175               | 2,673           | -                      | 6,477                   | -                  |
| Coverage (Illumina)   | 744              | 3,873               | 555             | 1,116                  | 1,021                   | -                  |
| Mitogenome length     | 163,449          | 45,604              | 144,970         | 115,036                | 58,959                  | 57,732             |
| GC content            | 28.68%           | 34.55%              | 28.26%          | 23.39%                 | 33.17%                  | 28.22%             |
| # tRNAs               | 27               | 26                  | 26              | 27                     | 25                      | 26                 |
| # Standard genes (17) | 17               | 17                  | 17              | 17                     | 17                      | 17                 |
| # Exons               | 78               | 20                  | 38              | 45                     | 18                      | 25                 |
| atp6                  | 1                | 1                   | 1               | 1                      | 1                       | 1                  |
| atp8                  | 1                | 1                   | 1               | 1                      | 1                       | 1                  |
| atp9                  | 1                | 1                   | 1               | 1                      | 1                       | 1                  |
| cob                   | 9                | 3                   | 3               | 6                      | 2                       | 2                  |
| cox1                  | 24               | 2                   | 12              | 13                     | 1                       | 7                  |
| cox2                  | 5                | 1                   | 1               | 3                      | 1                       | 1                  |
| cox3                  | 3                | 1                   | 1               | 2                      | 1                       | 1                  |
| nad1                  | 5                | 1                   | 1               | 3                      | 1                       | 1                  |
| nad2                  | 2                | 1                   | 1               | 1                      | 1                       | 1                  |
| nad3                  | 1                | 1                   | 1               | 1                      | 1                       | 1                  |
| nad4                  | 2                | 1                   | 1               | 2                      | 1                       | 1                  |
| nad4L                 | 1                | 1                   | 1               | 1                      | 1                       | 1                  |
| nad5                  | 7                | 1                   | 2               | 3                      | 1                       | 1                  |
| nad6                  | 1                | 1                   | 1               | 1                      | 1                       | 1                  |
| rps3                  | 1                | 1                   | 1               | 1                      | 1                       | 1                  |
| rnl                   | 13               | 1                   | 8               | 4                      | 1                       | 2                  |
| rns                   | 1                | 1                   | 1               | 1                      | 1                       | 1                  |
| # Introns             | 61               | 3                   | 21              | 28                     | 1                       | 8                  |
| # ORFs                | 95               | 18                  | 100             | 66                     | 30                      | 24                 |
| HEG <sup>a</sup>      | 21               | 2                   | 15              | 22                     | 0                       | 6                  |
| dpoB <sup>b</sup>     | 3                | 1                   | 11              | 4                      | 5                       | 1                  |
| Length of exons       | 21,975 (13.44%)  | 21,345 (46.81%)     | 24,328 (16.78%) | 22,242 (19.33%)        | 23,435 (39.75%)         | 21,795 (37.75%)    |
| Length of introns     | 62,449 (38.21%)  | 2,829 (6.2%)        | 25,366 (17.5%)  | 34,228 (29.75%)        | 755 (1.28%)             | 8,733 (15.13%)     |
| Length of intergene   | 79,025 (48.35%)  | 21,430 (46.99%)     | 95,276 (65.72%) | 58,566 (50.91%)        | 34,769 (58.97%)         | 27,204 (47.12%)    |

<sup>a</sup>Homing endonucleases containing LAGLIDADG or GIY-YIG domain. <sup>b</sup>Family B DNA polymerase.

Table S1: Putative intronic and intergenic ORFs and pfam annotations.

Table S2: Details of intron properties and HMM domain prediction. The protein domains were predicted against intron sequences directly, hence may not locate in ORF.

Table S3: Length of different mitogenome properties of 59 *Pyrrhoderma noxious* isolates.

## References

594

595 Aguilera G, de Vienne DM, Ross ON, Hood ME, Giraud T, Petit E, Gabaldón T.  
596 2014. High variability of mitochondrial gene order among fungi. *Genome Biology*  
597 and *Evolution* 6:451-465.

598 Akiba M, Ota Y, Tsai IJ, Hattori T, Sahashi N, Kikuchi T. 2015. Genetic  
599 differentiation and spatial structure of *Phellinus noxius*, the causal agent of brown  
600 root rot of woody plants in Japan. *Plos One* 10:e0141792.

601 Ann P-J, Chang T-T, Ko W-H. 2002. *Phellinus noxius* brown root rot of fruit and  
602 ornamental trees in Taiwan. *Plant Disease* 86:820-826.

603 Basse CW. 2010. Mitochondrial inheritance in fungi. *Current opinion in microbiology*  
604 13:712-719.

605 Benson G. 1999. Tandem repeats finder: a program to analyze DNA sequences.  
606 *Nucleic Acids Research* 27:573-580.

607 Berger KH, Yaffe MP. 2000. Mitochondrial DNA inheritance in *Saccharomyces*  
608 *cerevisiae*. *Trends in microbiology* 8:508-513.

609 Bullerwell CE, Leigh J, Forget L, Lang BF. 2003. A comparison of three fission yeast  
610 mitochondrial genomes. *Nucleic Acids Research* 31:759-768.

611 Burger G, Gray MW, Franz Lang B. 2003. Mitochondrial genomes: anything goes.  
612 *Trends in genetics* : TIG 19:709-716.

613 Capella-Gutierrez S, Silla-Martinez JM, Gabaldon T. 2009. trimAl: a tool for  
614 automated alignment trimming in large-scale phylogenetic analyses. *Bioinformatics*  
615 25:1972-1973.

616 Casselton LA, Kües U. 2007. The origin of multiple mating types in the model  
617 mushrooms *Coprinopsis cinerea* and *Schizophyllum commune*. In: Heitman J,  
618 Kronstad JW, Taylor JW, Casselton LA, editors: American Society of Microbiology.  
619 p. 283-300.

620 Chung C-L, Huang S-Y, Huang Y-C, Tzean S-S, Ann P-J, Tsai J-N, Yang C-C, Lee  
621 H-H, Huang T-W, Huang H-Y, et al. 2015. The genetic structure of *Phellinus noxius*  
622 and dissemination pattern of brown root rot disease in Taiwan. *Plos One*  
623 10:e0139445.

624 Chung C-L, Lee TJ, Akiba M, Lee H-H, Kuo T-H, Liu D, Ke H-M, Yokoi T, Roa  
625 MB, Lu M-YJ, et al. 2017. Comparative and population genomic landscape of  
626 *Phellinus noxius*: A hypervariable fungus causing root rot in trees. *Molecular Ecology*  
627 10:e0141792-0141716.

de la Bastide PY, Horgen PA. 2003. Mitochondrial inheritance and the detection of non-parental mitochondrial DNA haplotypes in crosses of *Agaricus bisporus* homokaryons. *Fungal Genetics and Biology* 38:333-342.

Deng Y, Hsiang T, Li S, Lin L, Wang Q, Chen Q, Xie B, Ming R. 2018. Comparison of the mitochondrial genome sequences of six *Annulohyphoxylon stygium* isolates suggests short fragment insertions as a potential factor leading to larger genomic size. *Frontiers in microbiology* 9:380.

Dierckxsens N, Mardulyn P, Smits G. 2017. NOVOPlasty: de novo assembly of organelle genomes from whole genome data. *Nucleic Acids Research* 45:e18.

Dobin A, Davis CA, Schlesinger F, Drenkow J, Zaleski C, Jha S, Batut P, Chaisson M, Gingeras TR. 2013. STAR: ultrafast universal RNA-seq aligner. *Bioinformatics* 29:15-21.

Edgar RC. 2004. MUSCLE: a multiple sequence alignment method with reduced time and space complexity. *BMC bioinformatics* 5:113.

Fedler M, Luh K-S, Stelter K, Nieto-Jacobo F, Basse CW. 2009. The *a2* mating-type locus genes *lga2* and *rga2* direct uniparental mitochondrial DNA (mtDNA) inheritance and constrain mtDNA recombination during sexual development of *Ustilago maydis*. *Genetics* 181:847-860.

Férandon C, Xu J, Barroso G. 2013. The 135 kbp mitochondrial genome of *Agaricus bisporus* is the largest known eukaryotic reservoir of group I introns and plasmid-related sequences. *Fungal Genetics and Biology* 55:85-91.

Finn RD, Coghill P, Eberhardt RY, Eddy SR, Mistry J, Mitchell AL, Potter SC, Punta M, Qureshi M, Sangrador-Vegas A, et al. 2016. The Pfam protein families database: towards a more sustainable future. *Nucleic Acids Research* 44:D279-D285.

Floudas D, Binder M, Riley R, Barry K, Blanchette RA, Henrissat B, Martinez AT, Otillar R, Spatafora JW, Yadav JS, et al. 2012. The Paleozoic origin of enzymatic lignin decomposition reconstructed from 31 fungal genomes. *Science* 336:1715-1719.

Formighieri EF, Tiburcio RA, Armas ED, Medrano FJ, Shimo H, Carels N, Góes-Neto A, Cotomacci C, Carazzolle MF, Sardinha-Pinto N, et al. 2008. The mitochondrial genome of the phytopathogenic basidiomycete *Moniliophthora perniciosa* is 109 kb in size and contains a stable integrated plasmid. *Mycological Research* 112:1136-1152.

Franco MEE, López SMY, Medina R, Lucentini CG, Troncozo MI, Pastorino GN, Saparrat MCN, Balatti PA. 2017. The mitochondrial genome of the plant-pathogenic



662 fungus *Stemphylium lycopersici* uncovers a dynamic structure due to repetitive and  
663 mobile elements. Plos One 12:e0185545.

664 Fritsch ES, Chabbert CD, Klaus B, Steinmetz LM. 2014. A genome-wide map of  
665 mitochondrial DNA recombination in yeast. Genetics 198:755-771.

666 Haugen P, Simon DM, Bhattacharya D. 2005. The natural history of group I introns.  
667 Trends in genetics : TIG 21:111-119.

668 Hausner G. 2003. Fungal Mitochondrial Genomes, Plasmids and Introns. In: Arora  
669 DK, Khachatourians GG, editors: Elsevier. p. 101-131.

670 Hausner G. 2012. Introns, Mobile Elements, and Plasmids. In. Berlin, Heidelberg:  
671 Springer Berlin Heidelberg. p. 329-357.

672 Hawksworth DL, Lücking R. 2017. Fungal diversity revisited: 2.2 to 3.8 million  
673 species. Microbiology spectrum 5.

674 Hepting GH. 1971. Diseases of forest and shade trees of the United States.  
675 Washington, DC: U.S. Department of Agriculture Forest Service.

676 Himmelstrand K, Olson Å, Durling MB, Karlsson M, Stenlid J. 2014. Intronic and  
677 plasmid-derived regions contribute to the large mitochondrial genome sizes of  
678 Agaricomycetes. Current Genetics 60:303-313.

679 Hintz W, Anderson JB, Horgen PA. 1988. Nuclear migration and mitochondrial  
680 inheritance in the mushroom *Agaricus bitorquis*. Genetics 119:35-41.

681 Jin T, Horgen PA. 1993. Further characterization of a large inverted repeat in the  
682 mitochondrial genomes of *Agaricus bisporus* (= *A. brunnescens*) and related species.  
683 Current Genetics 23:228-233.

684 Jin T, Horgen PA. 1994. Uniparental mitochondrial transmission in the cultivated  
685 button mushroom, *Agaricus bisporus*. Applied and environmental microbiology  
686 60:4456-4460.

687 Jung PP, Friedrich A, Reisser C, Hou J, Schacherer J. 2012. Mitochondrial genome  
688 evolution in a single protoploid yeast species. G3-Genes Genomes Genetics 2:1103-  
689 1111.

690 Kalyaanamoorthy S, Minh BQ, Wong TKF, von Haeseler A, Jermini LS. 2017.  
691 ModelFinder: fast model selection for accurate phylogenetic estimates. Nature  
692 Methods 14:587-589.

693 Kanzi AM, Wingfield BD, Steenkamp ET, Naidoo S, van der Merwe NA. 2016.  
694 Intron derived size polymorphism in the mitochondrial genomes of closely related  
695 *Chrysosporthe* species. Plos One 11:e0156104.

696 Krzywinski MI, Schein JE, Birol I, Connors J, Gascoyne R, Horsman D, Jones SJ,  
697 Marra MA. 2009. Circos: An information aesthetic for comparative genomics.  
698 Genome research 19:1639-1645.

699 Lang BF, Laforest M-J, Burger G. 2007. Mitochondrial introns: a critical view.  
700 Trends in genetics : TIG 23:119-125.

701 Laslett D, Canbäck B. 2004. ARAGORN, a program to detect tRNA genes and  
702 tmRNA genes in nucleotide sequences. Nucleic Acids Research 32:11-16.

703 Leducq J-B, Henault M, Charron G, Nielly-Thibault L, Terrat Y, Fiumera HL,  
704 Shapiro BJ, Landry CR. 2017. Mitochondrial recombination and introgression during  
705 speciation by hybridization. Molecular Biology and Evolution 34:1947-1959.

706 Li H. 2018. Minimap2: pairwise alignment for nucleotide sequences. Bioinformatics  
707 34:3094-3100.

708 Losada L, Pakala SB, Fedorova ND, Joardar V, Shabalina SA, Hostetler J, Pakala  
709 SM, Zafar N, Thomas E, Carres MR, et al. 2014. Mobile elements and mitochondrial  
710 genome expansion in the soil fungus and potato pathogen *Rhizoctonia solani* AG-3.  
711 FEMS Microbiology Letters 352:165-173.

712 Lowe TM, Chan PP. 2016. tRNAscan-SE On-line: integrating search and context for  
713 analysis of transfer RNA genes. Nucleic Acids Research 44:W54-57.

714 Mardanov AV, Beletsky AV, Kadnikov VV, Ignatov AN, Ravin NV. 2014. The 203  
715 kbp mitochondrial genome of the phytopathogenic fungus *Sclerotinia borealis* reveals  
716 multiple invasions of introns and genomic duplications. Plos One 9:e107536-107511.

717 Min B, Park H, Jang Y, Kim J-J, Kim KH, Pangilinan J, Lipzen A, Riley R, Grigoriev  
718 IV, Spatafora JW, et al. 2015. Genome sequence of a white rot fungus *Schizophora*  
719 *paradoxa* KUC8140 for wood decay and mycoremediation. Journal of biotechnology  
720 211:42-43.

721 Mullineux S-T, Costa M, Bassi GS, Michel F, HAUSNER G. 2010. A group II intron  
722 encodes a functional LAGLIDADG homing endonuclease and self-splices under  
723 moderate temperature and ionic conditions. Rna 16:1818-1831.

724 Nguyen L-T, Schmidt HA, von Haeseler A, Minh BQ. 2015. IQ-TREE: a fast and  
725 effective stochastic algorithm for estimating maximum-likelihood phylogenies.  
726 Molecular Biology and Evolution 32:268-274.

727 Nowrousian M. 2016. Complete mitochondrial genome sequence of the Pezizomycete  
728 *Pyronema confluens*. Genome announcements 4:e107536.

729 Sahashi N, Akiba M, Ishihara M, Ota Y, Kanzaki N. 2012. Brown root rot of trees  
730 caused by *Phellinus noxius* in the Ryukyu Islands, subtropical areas of Japan. Forest  
731 Pathology 42:353-361.

732 Salavirta H, Oksanen I, Kuuskeri J, Mäkelä M, Laine P, Paulin L, Lundell T. 2014.  
733 Mitochondrial genome of *Phlebia radiata* is the second largest (156 kbp) among fungi  
734 and features signs of genome flexibility and recent recombination events. Plos One  
735 9:e97141.

736 Sandor S, Zhang Y, Xu J. 2018. Fungal mitochondrial genomes and genetic  
737 polymorphisms. Applied Microbiology and Biotechnology 102:9433-9448.

738 Soorni A, Haak D, Zaitlin D, Bombarely A. 2017. Organelle\_PBA, a pipeline for  
739 assembling chloroplast and mitochondrial genomes from PacBio DNA sequencing  
740 data. BMC Genomics 18:49.

741 Swithers KS, Senejani AG, Fournier GP, Gogarten JP. 2009. Conservation of intron  
742 and intein insertion sites: implications for life histories of parasitic genetic elements.  
743 BMC Evolutionary Biology 9:303.

744 Thiel T, Michalek W, Varshney R, Graner A. 2003. Exploiting EST databases for the  
745 development and characterization of gene-derived SSR-markers in barley (*Hordeum*  
746 *vulgare*). Theoretical and Applied Genetics 106:411-422.

747 Toor N, Zimmerly S. 2002. Identification of a family of group II introns encoding  
748 LAGLIDADG ORFs typical of group I introns. Rna 8:1373-1377.

749 Voelz K, Ma H, Phadke S, Byrnes EJ, Zhu P, Mueller O, Farrer RA, Henk DA, Lewit  
750 Y, Hsueh Y-P, et al. 2013. Transmission of hypervirulence traits via sexual  
751 reproduction within and between lineages of the human fungal pathogen  
752 *Cryptococcus gattii*. PLoS Genetics 9:e1003771.

753 Walker BJ, Abeel T, Shea T, Priest M, Abouelliel A, Sakthikumar S, Cuomo CA,  
754 Zeng Q, Wortman J, Young SK, et al. 2014. Pilon: an integrated tool for  
755 comprehensive microbial variant detection and genome assembly improvement. Plos  
756 One 9:e112963.

757 Wang L, Zhang S, Li J-H, Zhang Y-J. 2018. Mitochondrial genome, comparative  
758 analysis and evolutionary insights into the entomopathogenic fungus *Hirsutella*  
759 *thompsonii*. Environmental Microbiology 7:916-939.

760 Wang Z, Shi X, Tao Y, Wu Q, Bai Y, Guo H, Tang D. 2018. The complete  
761 mitochondrial genome of *Parasesarma pictum* (Brachyura: Grapsoidea: Sesarmidae)  
762 and comparison with other Brachyuran crabs. Genomics.

763 Wang Z, Wilson A, Xu J. 2015. Mitochondrial DNA inheritance in the human fungal  
764 pathogen *Cryptococcus gattii*. Fungal Genetics and Biology 75:1-10.

765 Wheeler DL, Church DM, Federhen S, Lash AE, Madden TL, Pontius JU, Schuler  
766 GD, Schriml LM, Sequeira E, Tatusova TA, et al. 2003. Database resources of the  
767 National Center for Biotechnology. Nucleic Acids Research 31:28-33.

768 Wilson AJ, Xu J. 2012. Mitochondrial inheritance: diverse patterns and mechanisms  
769 with an emphasis on fungi. Mycology.

770 Wolf K, Burger G, Lang B, Kaudewitz F. 1976. Extrachromosomal inheritance in  
771 *Schizosaccharomyces pombe*. I. Evidence for an extrakaryotically inherited mutation  
772 conferring resistance to antimycin. Molecular & general genetics : MGG 144:67-73.

773 Wolters JF, Chiu K, Fiumera HL. 2015. Population structure of mitochondrial  
774 genomes in *Saccharomyces cerevisiae*. BMC Genomics 16:451.

775 Wu B, Buljic A, Hao W. 2015. Extensive horizontal transfer and homologous  
776 recombination generate highly chimeric mitochondrial genomes in yeast. Molecular  
777 Biology and Evolution 32:2559-2570.

778 Wu TD, Watanabe CK. 2005. GMAP: a genomic mapping and alignment program for  
779 mRNA and EST sequences. Bioinformatics 21:1859-1875.

780 Xiao S, Nguyen DT, Wu B, Hao W. 2017. Genetic drift and indel mutation in the  
781 evolution of yeast mitochondrial genome size. Genome Biology and Evolution  
782 9:3088-3099.

783 Xu J, Ali RY, Gregory DA, Amick D, Lambert SE, Yoell HJ, Vilgalys RJ, Mitchell  
784 TG. 2000. Uniparental mitochondrial transmission in sexual crosses in *Cryptococcus*  
785 *neoformans*. Current microbiology 40:269-273.

786 Xu J, He L. 2015. Current perspectives on mitochondrial inheritance in fungi. Cell  
787 Health and Cytoskeleton 7:143-112.

788 Xu J, Wang P. 2015. Mitochondrial inheritance in basidiomycete fungi. Fungal  
789 Biology Reviews 29:209-219.

790 Yan Z, Xu J. 2003. Mitochondria are inherited from the *MATa* parent in crosses of the  
791 basidiomycete fungus *Cryptococcus neoformans*. Genetics 163:1315-1325.

792 Zhou L-W, Ji X-H, Vlasák J, Dai Y-C. 2018. Taxonomy and phylogeny of  
793 *Pyrrhoderma*: a redefinition, the segregation of *Fulvoderma*, gen. nov., and  
794 identifying four new species. Mycologia 26:1-18.

795 Zhu P, Zhai B, Lin X, Idnurm A. 2013. Congenic strains for genetic analysis of  
796 virulence traits in *Cryptococcus gattii*. Infection and immunity 81:2616-2625.





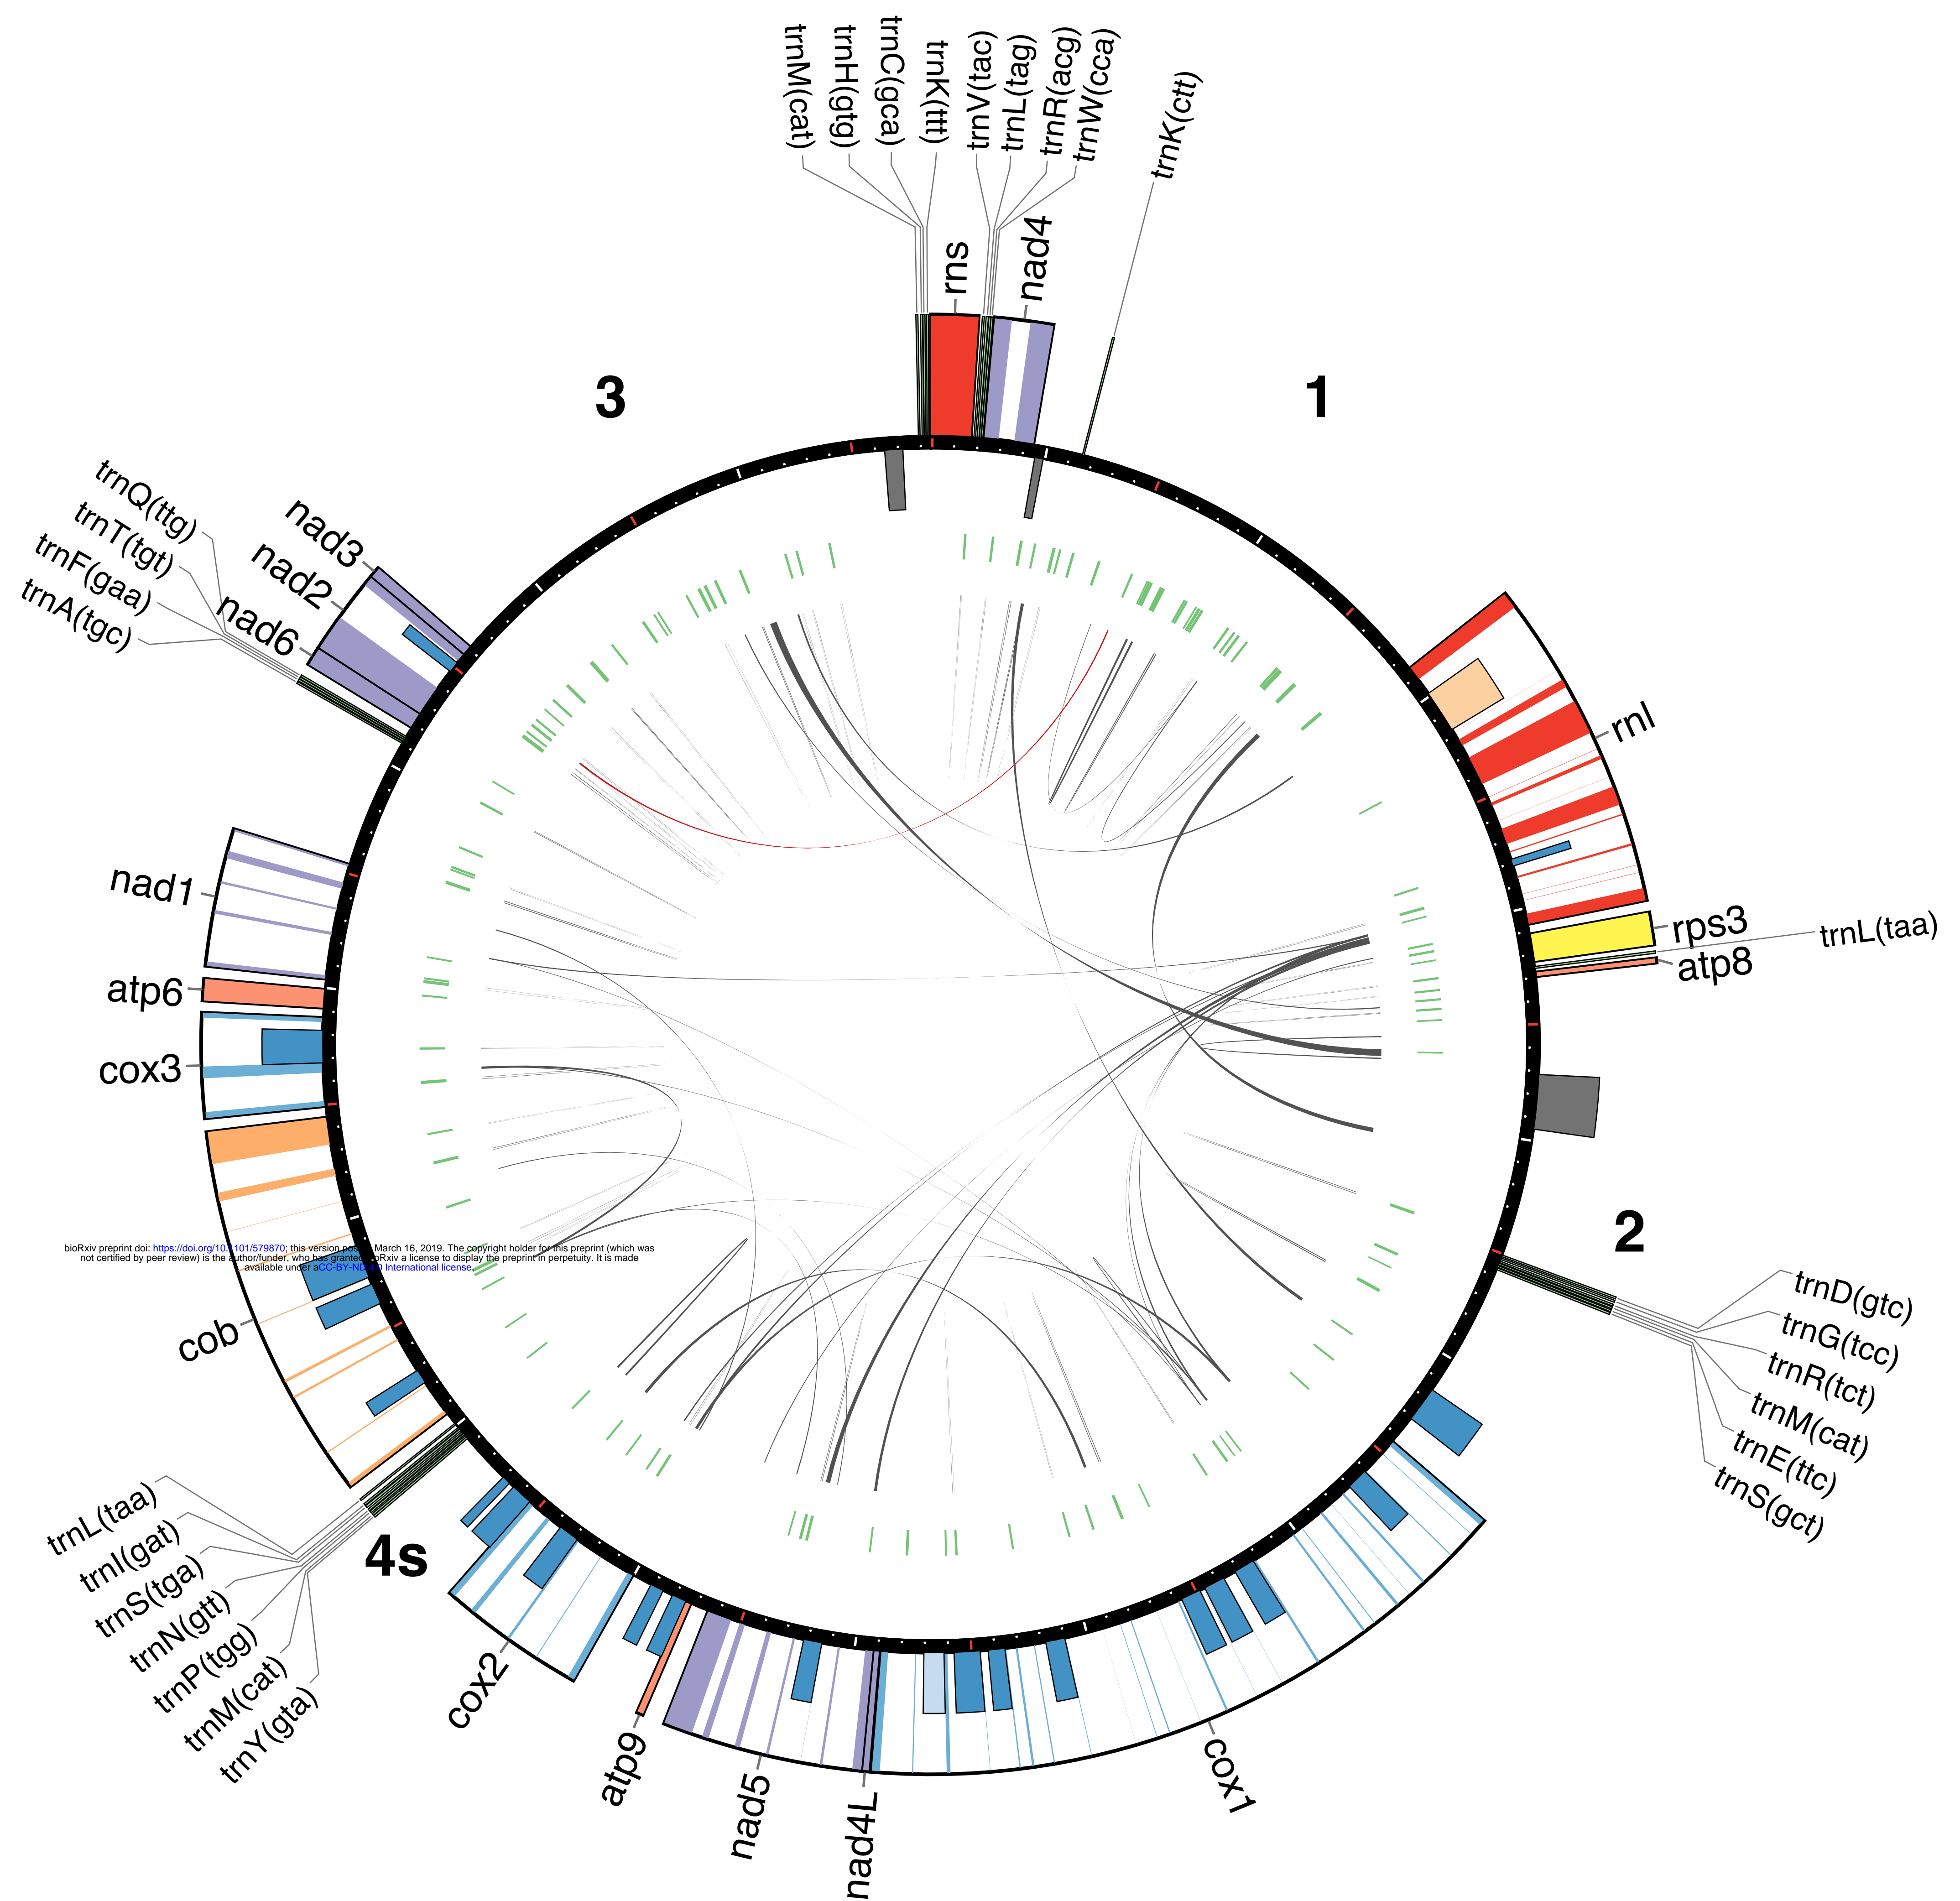

### Protein-coding genes

- Complex I (NADH dehydrogenase)
- Complex III (ubiquinol cytochrome c reductase)
- Complex IV (cytochrome c oxidase)
- ATP synthase
- Ribosomal protein

### Noncoding genes

- Ribosomal RNA
- Transfer RNA

### ORFs

- LAGLIDADG endonuclease
- GIY-YIG endonuclease
- Reverse transcriptase
- Family B DNA polymerase



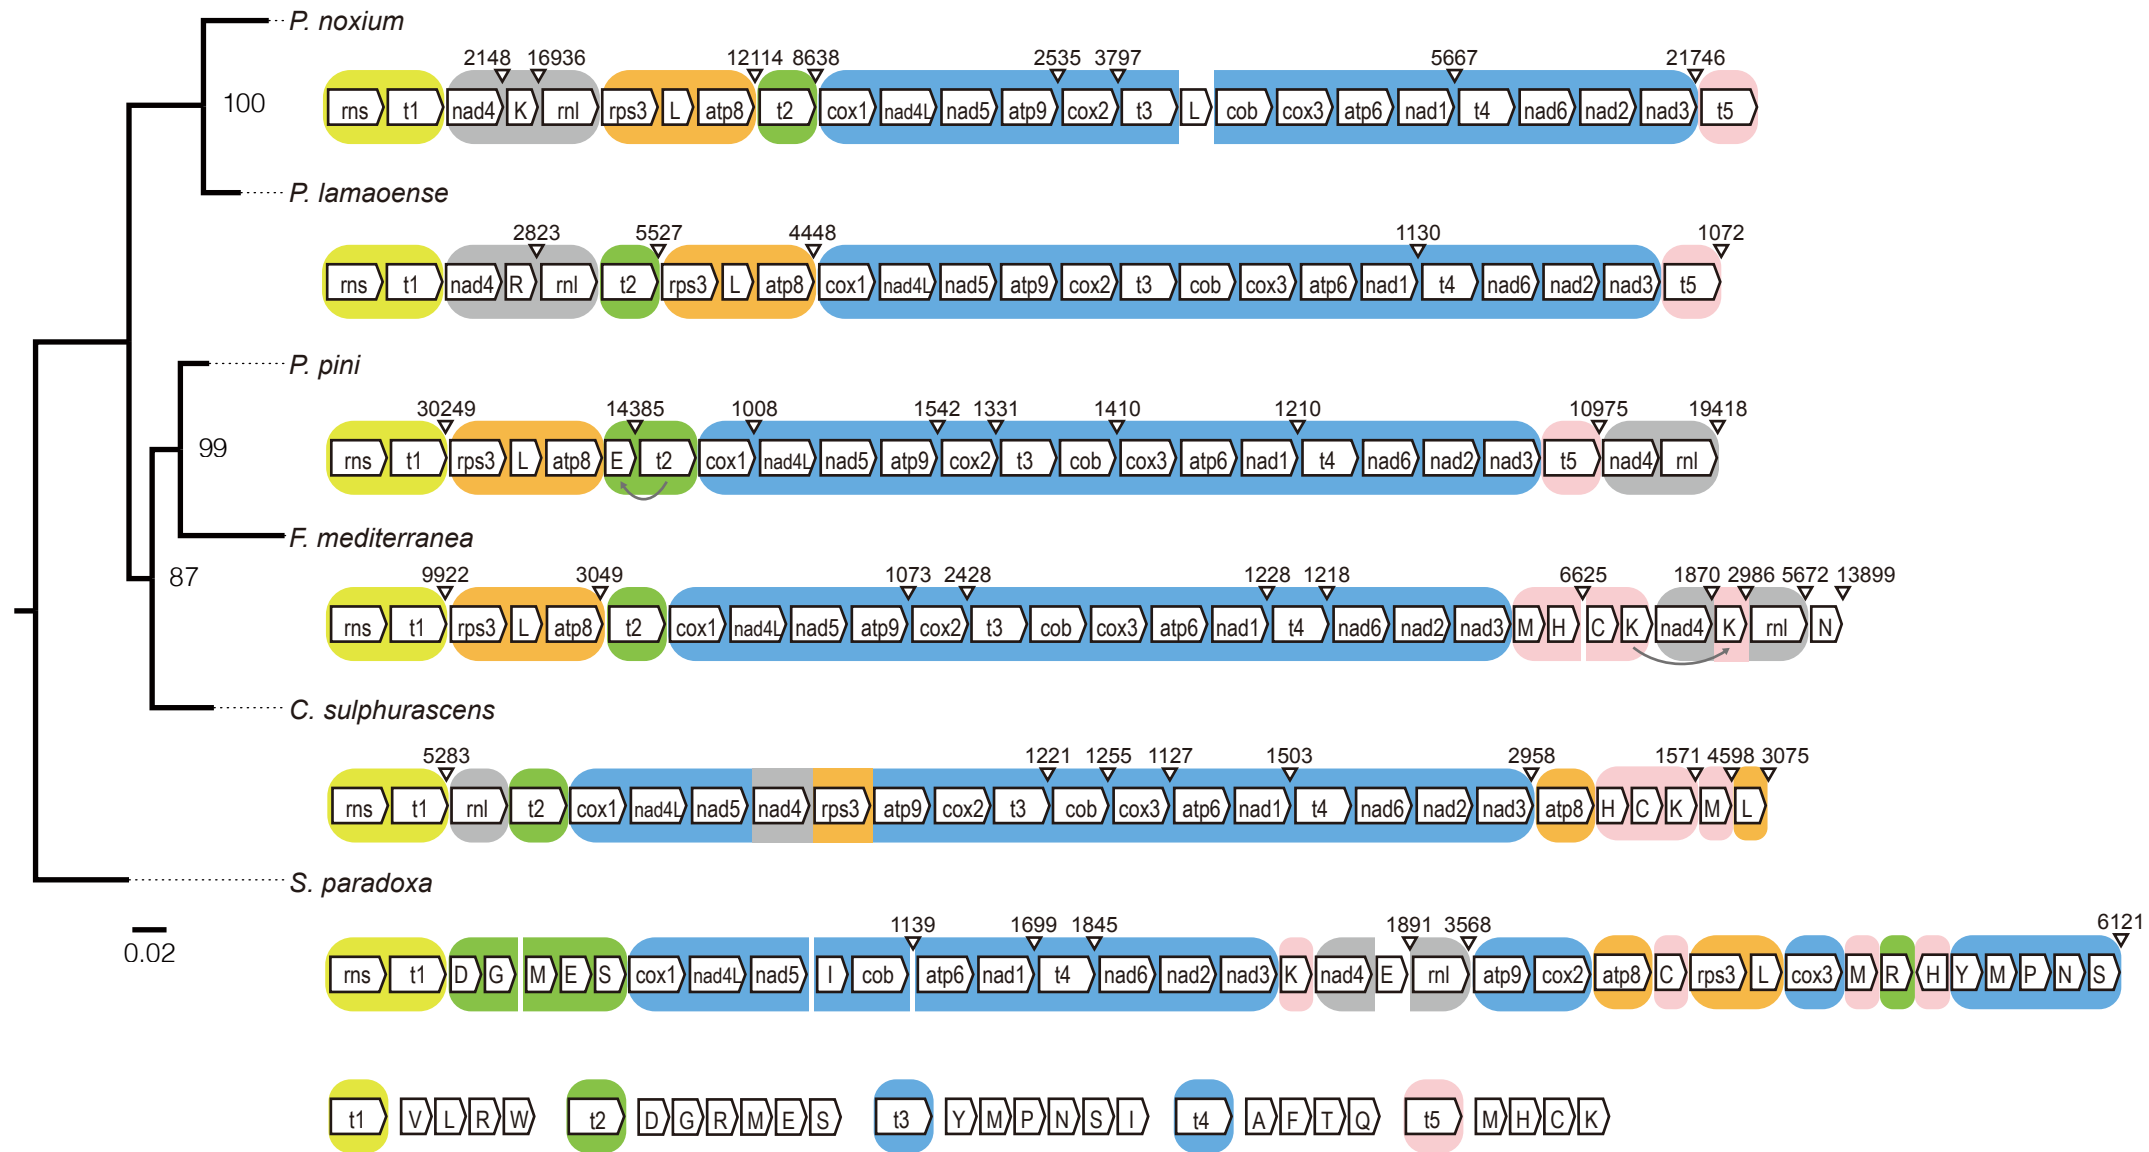

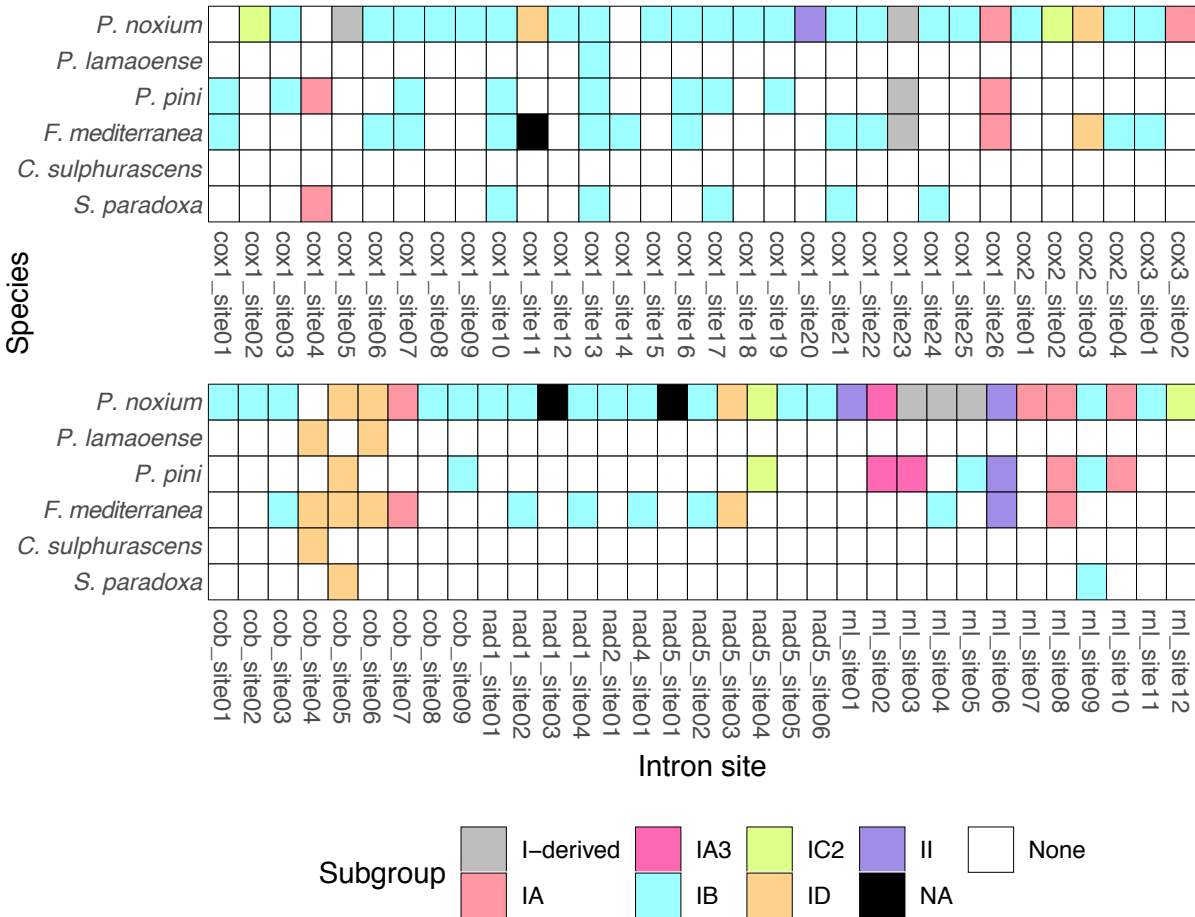

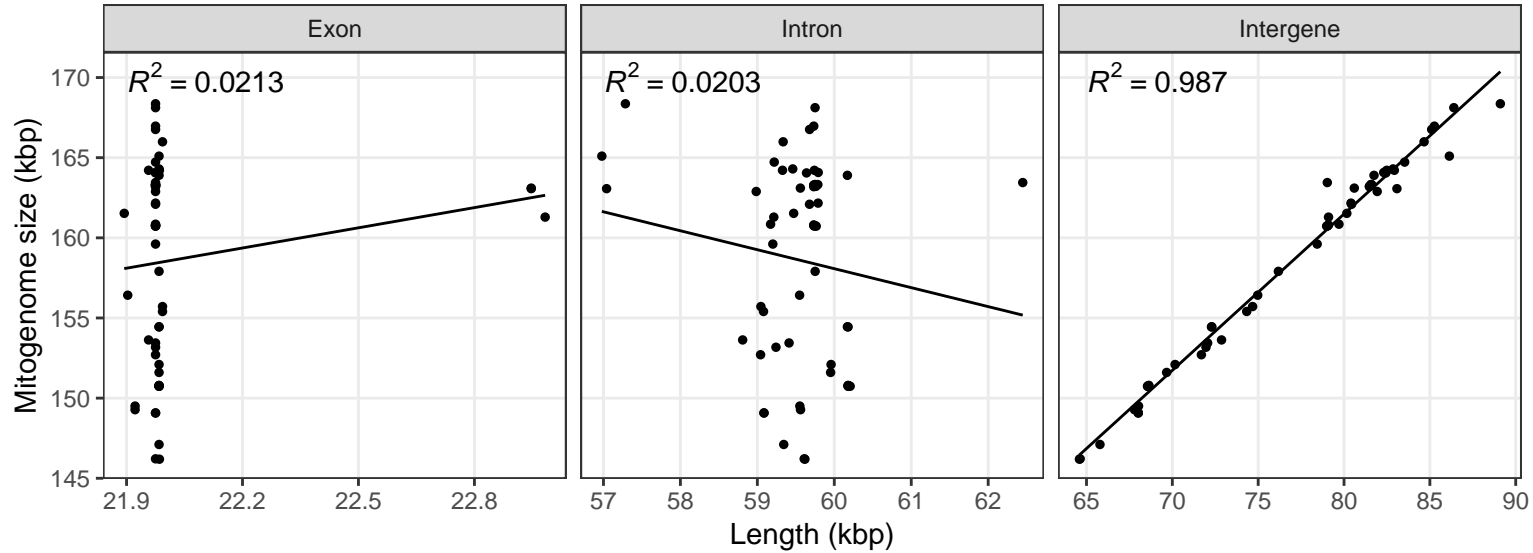

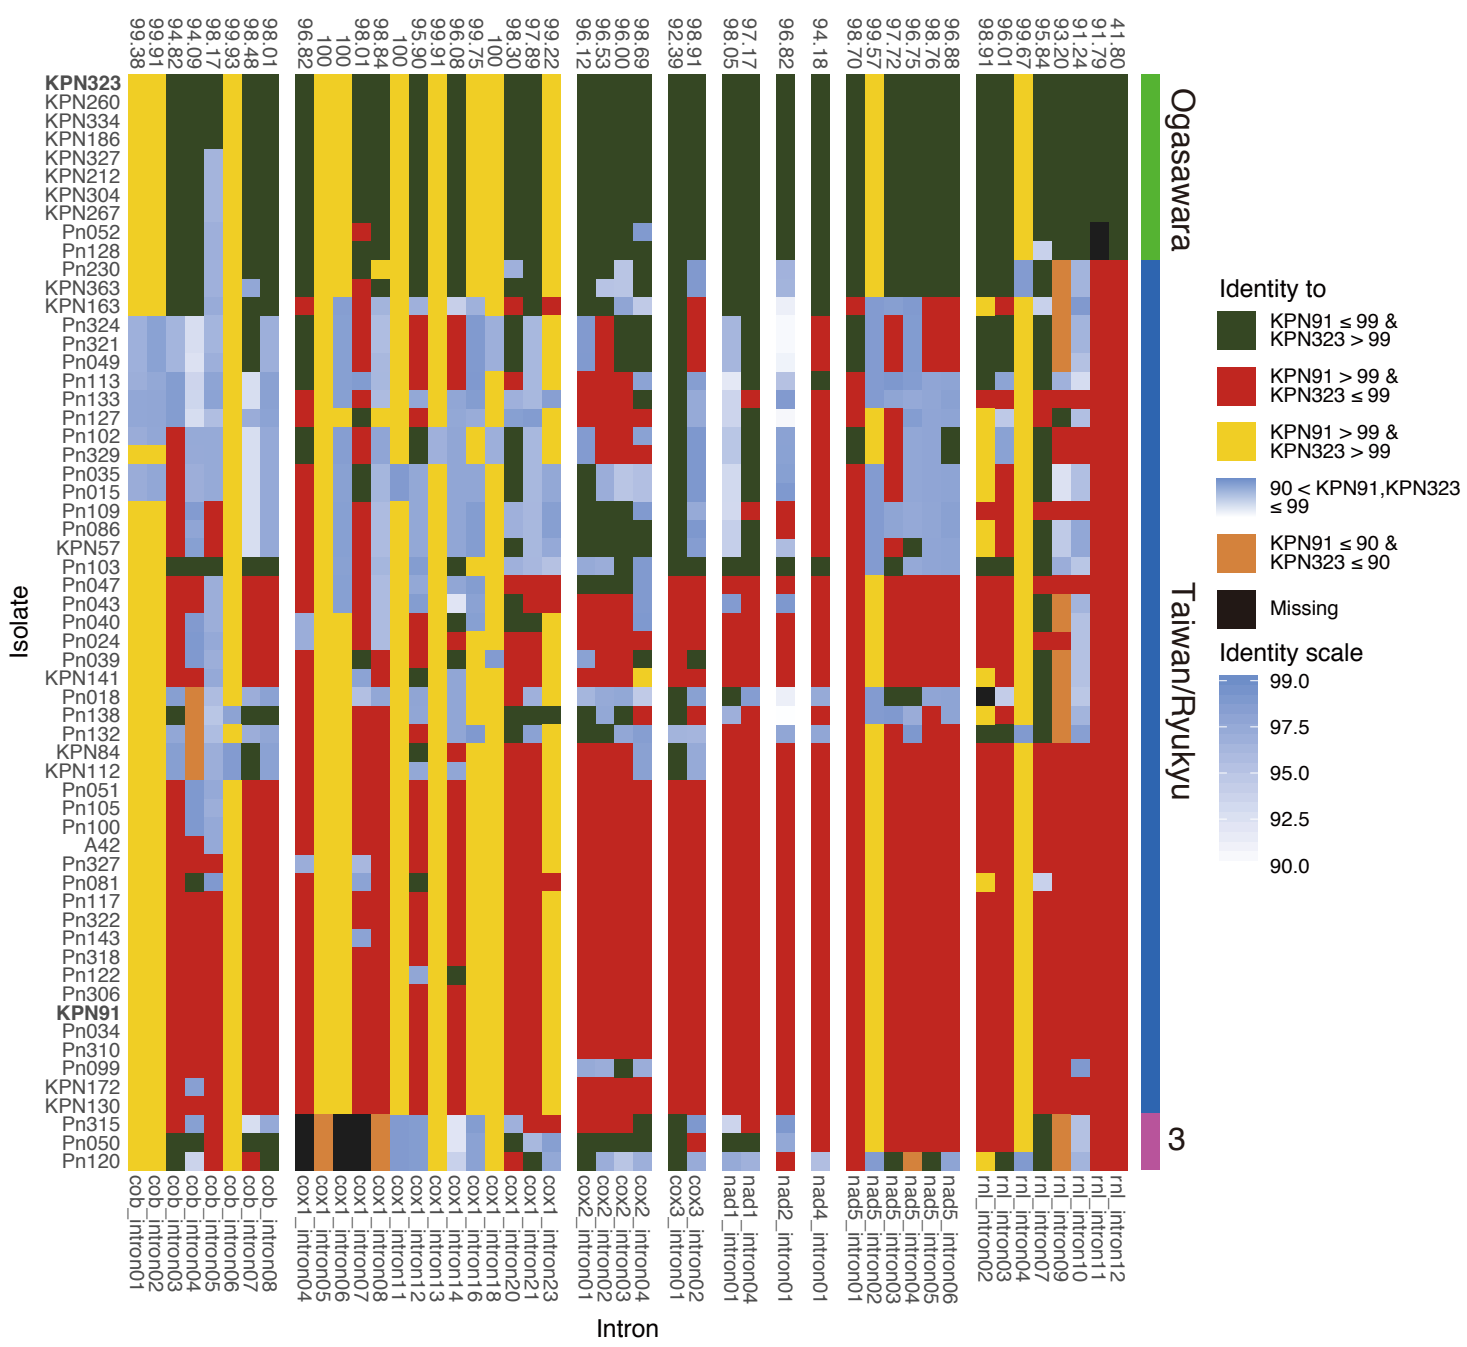

(A)

Group

Ogasarawa

Taiwan/Ryukyu

Taiwan/Ryukyu  
(no-rearrangement)Taiwan/Ryukyu  
(rearrangement)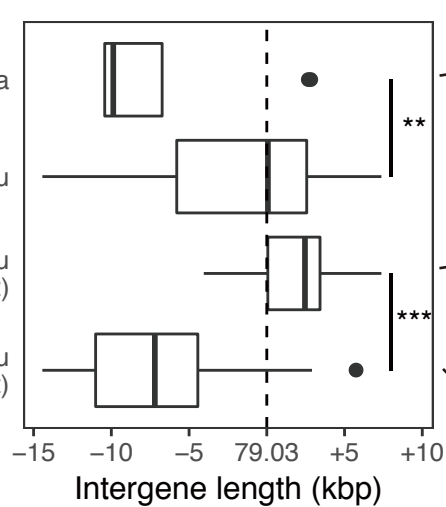

(B)

KPN323

KPN91

Pn113

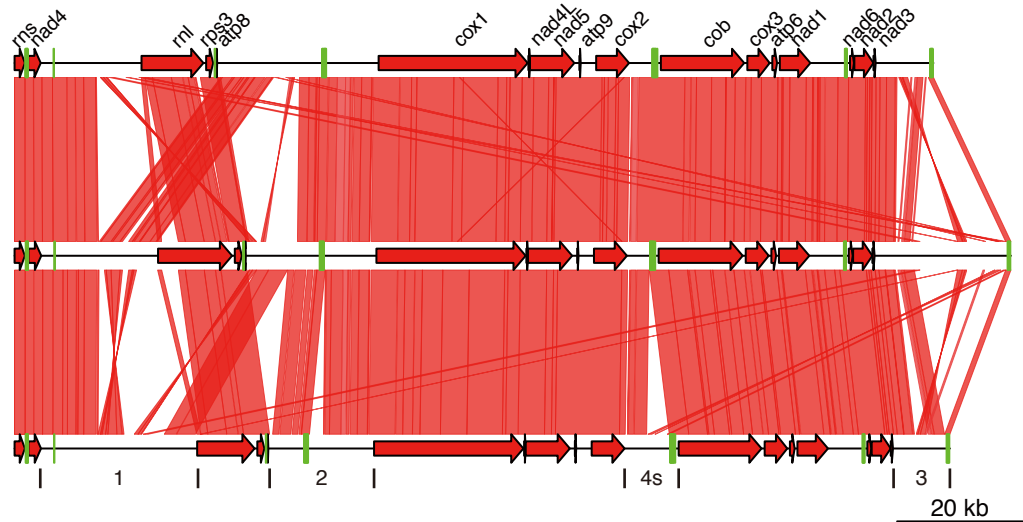

Source: https://www.biorxiv.org/content/10.1101/579870v1.full.pdf
